# Supplementary material for: Interannual variability of ozone fluxes in a broadleaf deciduous forest in Italy
Source: Oxford University Press journal article supplement (doi:10.1525/elementa.2021.00105), 2022-01-01
Supplement: description_of_supplementary_data_rev.docx [file description_of_supplementary_data_rev.docx]

The file “**SupplementaryData_Gerosa_et_al.xlsx**” contains three datasets.
The variables reported in each dataset are described in the following tables.

**DATASET #1 – Monthly data of ozone fluxes and deposition velocity**(storage corrected and partitioned with the 3rd method based on canopy transpiration)

| Variable | unit | description |
| --- | --- | --- |
| YEAR | Integer number | **Year** |
| MONTH | Integer number | **Month of the year** |
| F_TotO3 STORAGE CORR | nmolO3 m-2 s-1 | **Total ozone flux (monthly mean, storage corrected)** |
| ST ERR F_TotO3 STORAGE CORR | nmolO3 m-2 s-1 | standard error of the total ozone flux |
| F_NonStomO3 STORAGE CORR | nmolO3 m-2 s-1 | **Non-stomatal part of ozone flux (monthly mean, storage corrected)** |
| ST ERR F_NonStomO3 STORAGE CORR | nmolO3 m-2 s-1 | standard error of the non-stomatal ozone flux |
| F_StomO3 STORAGE CORR | nmolO3 m-2 s-11 | **Stomatal part of ozone flux (monthly mean, storage corrected)** |
| ST ERR F_StomO3 STORAGE CORR | nmolO3 m-2 s-11 | standard error of the stomatal ozone flux |
| VdepO3 | m s-1 | **Deposition velocity for ozone (monthly mean)** |
| ST ERR VdepO3 | m s-1 | standard error of the deposition velocity |

**DATASET #2 – Hourly means of ozone fluxes (storage corrected and not) averaged per each month over all years**
(partitioned with the 3rd method based on canopy transpiration)

| Variable | unit | description |
| --- | --- | --- |
| MONTH | Integer number | **Month of the year** |
| F_TotO3 | nmolO3 m-2 s-11 | **Total ozone flux (non storage corrected)** |
| ST ERR F_TotO3 | nmolO3 m-2 s-11 | standard error of the total ozone flux, non storage corrected |
| F_TotO3 STORAGE CORR | nmolO3 m-2 s-11 | **Total ozone flux (storage corrected)** |
| ST ERR F_TotO3 STORAGE CORR | nmolO3 m-2 s-11 | standard error of the total ozone flux, storage corrected |
| F_NonStomO3 | nmolO3 m-2 s-11 | **Non-stomatal part of ozone flux (non storage corrected)** |
| ST ERR F_NonStomO3 | nmolO3 m-2 s-11 | standard error of the non-stomatal ozone flux, non storage corrected |
| F_NonStomO3 STORAGE CORR | nmolO3 m-2 s-11 | **Non-stomatal part of ozone flux (storage corrected)** |
| ST ERR F_NonStomO3 STORAGE CORR | nmolO3 m-2 s-11 | standard error of the non-stomatal ozone flux, storage corrected |
| F_StomO3 | nmolO3 m-2 s-11 | **Stomatal part of ozone flux** |
| ST ERR F_StomO3 | nmolO3 m-2 s-11 | standard error of the stomatal ozone flux |

**DATASET #3 – Hourly means of deposition velocity, conductances and main meteorological parameters, averaged over the summer months per each year**
(storage corrected and partitioned with the 3rd method based on canopy transpiration)

| Variable | unit | description |
| --- | --- | --- |
| YEAR | Integer number | **Year** |
| HOUR | hh:mm:ss | **Hour of the day** |
| g_StomO3 | m s-1 | **Stomatal conductance to O3** |
| ST ERR gstomO3 | m s-1 | standard error of g_StomO3 |
| g_NonStomO3 | m s-1 | **Non-stomatal conductance to O3** |
| ST ERR g_NonStomO3 | m s-1 | standard error of g_NonStomO3 |
| gc_O3 | m s-1 | **Canopy conductance to O3** |
| ST ERR gc_O3 | m s-1 | standard error of gc_O3 |
| Vdep | m s-1 | **Deposition velocity for O3** |
| St ERR Vdep | m s-1 | standard error of Vdep |
| T_air | °C | **Air temperature at 41m** |
| RH | % | **Relative humidity at 41m** |
| WindSpeed | m s-1 | **Horizontal wind speed at 41m** |
| ustar | m s-1 | **Friction velocity** |
| Prevailing stability class | label | **Most frequently observed stability class** (Stable, Very Stable, Neutral, Unstable, Very Unstable) |
